# Supplementary material
Source: PubMed Central journal article supplement (PMC6589753)
Supplement: pnas.1818372116.sapp.pdf [file pnas.1818372116.sapp.pdf]

1

## 2 **Supplementary Information for**

3  **$^2\text{H}/^1\text{H}$  variation in microbial lipids is controlled by NADPH metabolism**

4 **Reto S. Wijker, Alex L. Sessions, Tobias Fuhrer and Michelle Phan**

5 **Reto S. Wijker.**

6 **E-mail: [rwijker@caltech.edu](mailto:rwijker@caltech.edu)**

### 7 **This PDF file includes:**

8     Supplementary text

9     Figs. S1 to S5

10    Tables S1 to S4

11    References for SI reference citations

## 12 Supporting Information Text

### 13 Model description

14 The overall topology of our model is shown in [Figure S1](#). Isotopic compositions ( $^2\text{H}/^1\text{H}$  ratios) are represented by R's, and  
15 molar fluxes by J's. Two distinct cases need to be considered separately, that of under or balanced production of NADPH,  
16 and that of over production. In the former case, the membrane-bound transhydrogenase ( $J_U$ ) is active, while the soluble  
17 transhydrogenase is not ( $J_O = 0$ ). Conversely, in the latter case the soluble transhydrogenase ( $J_O$ ) is active while the  
18 membrane-bound transhydrogenase is not ( $J_U = 0$ ).  $R_{\text{acetate}}$ ,  $J_{\text{acetate}}$ ,  $R_{\text{water}}$ , and  $J_{\text{water}}$  are treated as constants in the model  
19 (see discussion in main text).

20 When NADPH is underproduced, there are 5 sources of NADPH (glucose-6P-dehydrogenase,  $J_G$ ; 6P-gluconate dehydrogenase,  
21  $J_P$ ; isocitrate dehydrogenase,  $J_I$ ; malic enzyme,  $J_M$ ; and membrane-bound transhydrogenase,  $J_U$ ) and only one sink ( $J_{\text{NADPH}}$ ).  
22 During balanced production,  $J_U = 0$  and there are only 4 sources. Regardless, to satisfy mass balance, the flux and isotopic  
23 composition of the output of NADPH must equal the sum of the inputs, thus:

$$J_{\text{NADPH}} = J_G + J_P + J_I + J_M + J_U \quad [1]$$

$$J_{\text{NADPH}} R_{\text{NADPH}} = J_G R_G + J_P R_P + J_I R_I + J_M R_M \quad [2]$$
$$+ J_U R_U$$

24 The four dehydrogenase fluxes are measured.  $J_U$  is calculated based on the anabolic NADPH demand which is estimated  
25 from the measured biomass yield. All five input isotopic compositions are fit by the model.

26  
27 When NADPH is overproduced, there are now four sources ( $J_G$ ,  $J_P$ ,  $J_I$ ,  $J_M$ ) and two sinks ( $J_O$  and  $J_{\text{NADPH}}$ ). This represents  
28 a branchpoint in the reaction network, so the isotopic composition of the sinks of NADPH will depend on i) the sources, ii) the  
29 fractionation between the two sinks for NADPH, and iii) the branching ratio of NADPH between anabolism and conversion to  
30 NADH (1). For simplicity, we first summarize the four sources in a single term:

$$J_{\text{in}} = J_G + J_P + J_I + J_M \quad [3]$$

$$R_{\text{in}} = \frac{J_G R_G + J_P R_P + J_I R_I + J_M R_M}{J_{\text{in}}} \quad [4]$$

31 The expression of isotopic mass balance for our system is then

$$J_{\text{in}} = J_{\text{NADPH}} + J_O \quad [5]$$

$$J_{\text{in}} R_{\text{in}} = J_{\text{NADPH}} R_{\text{NADPH}} + J_O R_O \quad [6]$$

32 The two sinks for NADPH can both be fractionating, leading to different isotopic compositions for  $R_{\text{NADPH}}$  and  $R_O$ .  
33 Normally these fractionations would be described by separate  $\alpha$  values

$$\alpha_{O/\text{in}} = \frac{R_O}{R_{\text{in}}} \quad [7]$$

$$\alpha_{\text{NADPH}/\text{in}} = \frac{R_{\text{NADPH}}}{R_{\text{in}}} \quad [8]$$

However, in this case we cannot resolve the individual fractionations, only the product of the two as expressed in the two  
sinks for NADPH. For simplicity we thus define a single fractionation factor between the two sinks as

$$\alpha_O = \frac{\alpha_{O/\text{in}}}{\alpha_{\text{NADPH}/\text{in}}} = \frac{R_O}{R_{\text{in}}} \frac{R_{\text{in}}}{R_{\text{NADPH}}} = \frac{R_O}{R_{\text{NADPH}}} \quad [9]$$

34 Substituting [Equation 9](#) into [6](#) then gives

$$J_{\text{in}} R_{\text{in}} = J_{\text{NADPH}} R_{\text{NADPH}} + J_O (\alpha_O R_{\text{NADPH}}) \quad [10]$$

which can be rearranged to solve for  $R_{\text{NADPH}}$

$$R_{\text{NADPH}} = \frac{J_{\text{in}} R_{\text{in}}}{J_{\text{NADPH}} + J_O \alpha_O} \quad [11]$$

35 Substituting [Equation 3 - 5](#) into [Equation 11](#) gives Equation 3 in the main text

$$R_{\text{NADPH}} = \frac{J_G R_G + J_P R_P + J_I R_I + J_M R_M}{J_G + J_P + J_I + J_M + J_O(\alpha_O - 1)} \quad [12]$$

36 For both NADPH overproduction and underproduction, the isotope composition of fatty acid ( $R_{\text{FA}}$ ) is calculated from

$$R_{\text{FA}} = \frac{J_{\text{NADPH}} R_{\text{NADPH}} + J_{\text{water}} R_{\text{water}} + J_{\text{acetate}} R_{\text{acetate}}}{J_{\text{NADPH}} + J_{\text{water}} + J_{\text{acetate}}} \quad [13]$$

37 Based on the known stoichiometry of fatty acid biosynthesis (2, 3), the flux from NADPH has to be twice as high as the  
38 flux from water and acetate. Therefore Equation 13 can be simplified as follows:

$$R_{\text{FA}} = 0.5R_{\text{NADPH}} + 0.25R_{\text{water}} + 0.25R_{\text{acetate}} \quad [14]$$

### 39 Correlation between NADPH over/underproduction and $^2\text{H}/^1\text{H}$ fractionation in *E. coli* knockout mutants

40 Strain JW1841 is a G6PDH deletion mutant that catabolizes glucose almost exclusively by the EMP pathway. Because almost  
41 no NADPH is generated by G6PDH and 6PGDH (some leakage is observed), JW1841 exhibits a strong underproduction of  
42 NADPH. This shortfall is compensated by PntAB (4) and increased ICDH and ME fluxes. Despite these differences, lipid  
43  $\delta^2\text{H}$  values in this mutant are almost equal to those of wildtype fatty acids (Table 1, Figure 3). In strain JW3985, deletion of  
44 glucose-6-phosphate isomerase blocks the EMP pathway. This mutation forces glucose metabolism primarily through the PP  
45 pathway and led to the largest flux changes that were detected in all investigated mutants (Table 1). Fluxes through ED, PP,  
46 and TCA pathways were all considerably increased relative to the wild type *E. coli* and the lipid  $\delta^2\text{H}$  value was over 40%  
47 higher. With this differences, JW3985 strain falls far off of the correlations for 6PGDH and ICDH (Figure 2), but well within  
48 the correlation for the ED pathway. This apparently conflicting result is potentially related to the extreme +164% NADPH  
49 imbalance that results from increased PP activity. The overproduction is compensated by the soluble transhydrogenase UdhA  
50 (4), which is particularly interesting because it is the only investigated *E. coli* culture that relies on UdhA (4) and yields  
51  $^2\text{H}$ -enriched lipids relative to all other *E. coli* cultures (Figure 3).  $^2\text{H}/^1\text{H}$  fractionation by the soluble transhydrogenase is  
52 therefore thought to be the dominant process for generating the lipid  $\delta^2\text{H}$  values in this mutant. In the mutants PntAB  
53 and UdhA, the membrane-bound (PntAB) and soluble (UdhA) transhydrogenases are knocked out, respectively. In the  
54 UdhA-PntAB double knockout mutant, both transhydrogenases are deleted. In order to still meet the anabolic NADPH  
55 demands without the membrane-bound transhydrogenase, the mutants PntAB and UdhA-PntAB raised their PP pathway  
56 fluxes which led to balanced NADPH fluxes in the double knockout mutant and a slightly negative NADPH balance in the  
57 mutant PntAB (Table 1). Knockout mutant PntAB falls off of the correlation for transhydrogenase fluxes (Figure 3) because  
58 it generates more  $^2\text{H}$ -enriched lipids than the wildtype and all the mutants with negative NADPH balance. In this mutant,  
59 the shortfall of NADPH cannot be balanced by the supposedly  $^2\text{H}$ -depleting PntAB transhydrogenase which may lead to the  
60 observed D-enrichment and growth defect (Table S4). In the double knockout mutant UdhA-PntAB, growth is partly restored  
61 because NADPH production and consumption is perfectly balanced. Instead of PntAB, the considerably higher PP pathway  
62 flux seems to deplete lipids in  $^2\text{H}$  to a similar extend as PntAB in the wildtype does (Figure 3). In mutant UdhA, carbon  
63 fluxes were similar to those in the wild type and NADPH balance is negative as well (Table 1, Figure 2). Because the soluble  
64 transhydrogenase is not required when NADPH balance is negative, growth rate, fluxes, and  $\delta^2\text{H}$  values are not significantly  
65 affected in the mutant UdhA (Figure 3, Table 1 and S4).

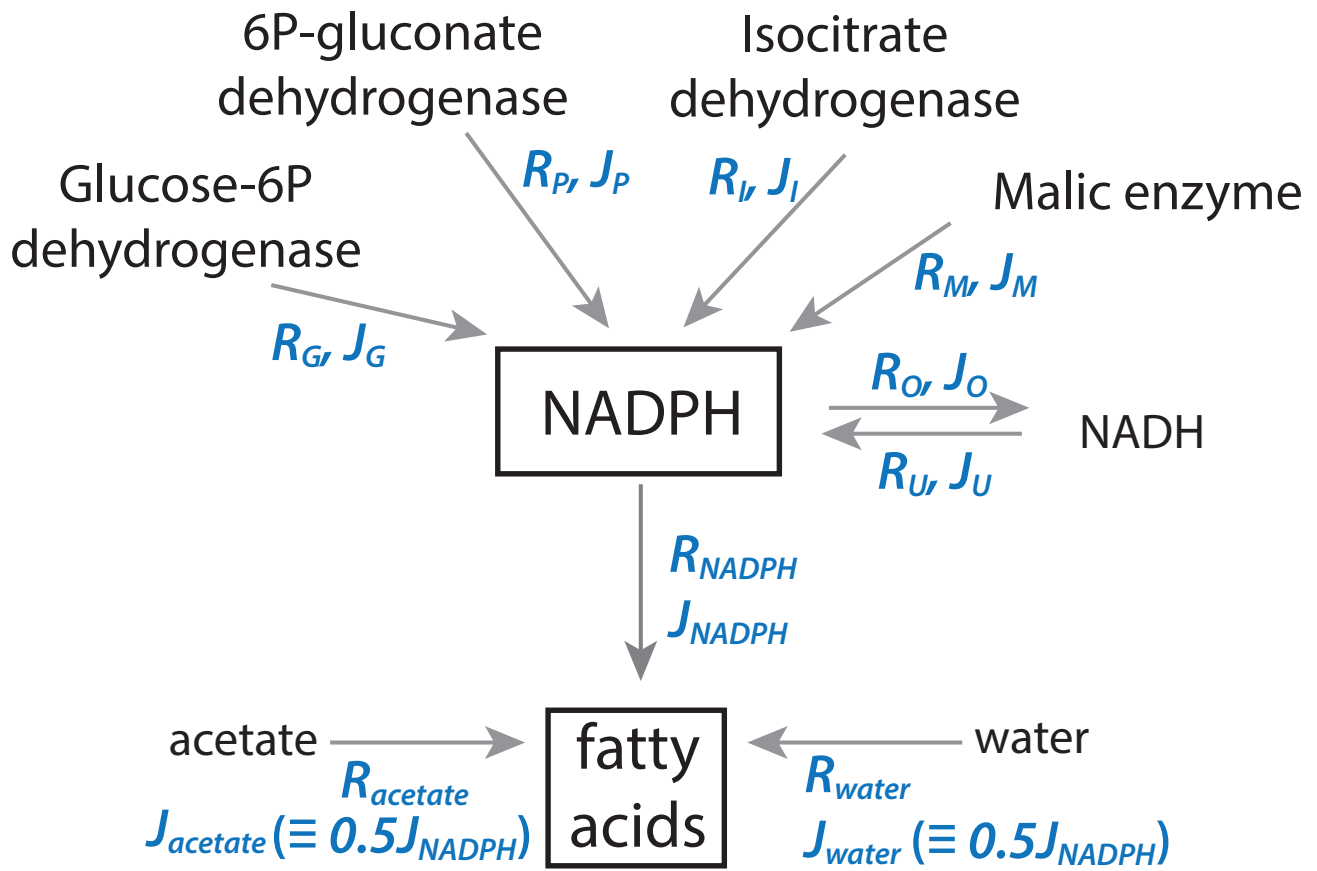

Fig. S1. Overall topology of our model. R's represent <sup>2</sup>H/<sup>1</sup>H ratios and J's molar fluxes.

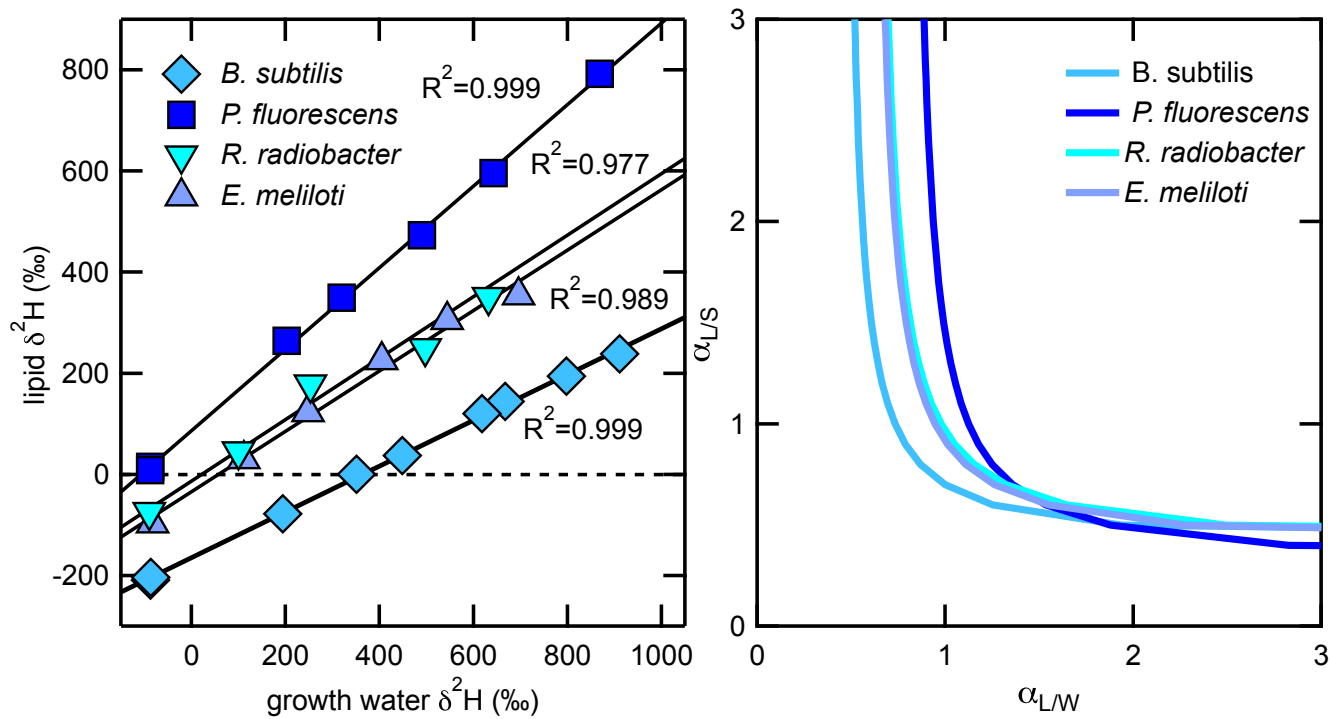

**Fig. S2.** Correlations between fatty acid  $\delta^2\text{H}$  values and culture medium  $\delta^2\text{H}$  values in *B. subtilis*, *P. fluorescens* WCS365, *R. radiobacter*, and *E. meliloti* (left panel). All cultures were grown on glucose. The same experiment was performed with *E. coli* and other organisms in a previous study (5). In all experiments, lipid  $\delta^2\text{H}$  values are strongly correlated with those of growth medium water ( $R^2 > 0.97$ ) with regression slopes ranging from 0.45 to 0.8. A direct interpretation of these correlation slopes as fractional water incorporation ( $X_w$ ) is not possible because of unknown fractionations between lipids and the two hydrogen sources ( $\alpha_{L/W}$ , and  $\alpha_{L/S}$ ) (5, 6). However, a comparison of fractionation curves (right panel) following the discussion of Zhang et al. (5) is possible and suggests an increase in  $\alpha_{L/W}$  but rather constant  $X_w$  and  $\alpha_{L/S}$  values in the four strains

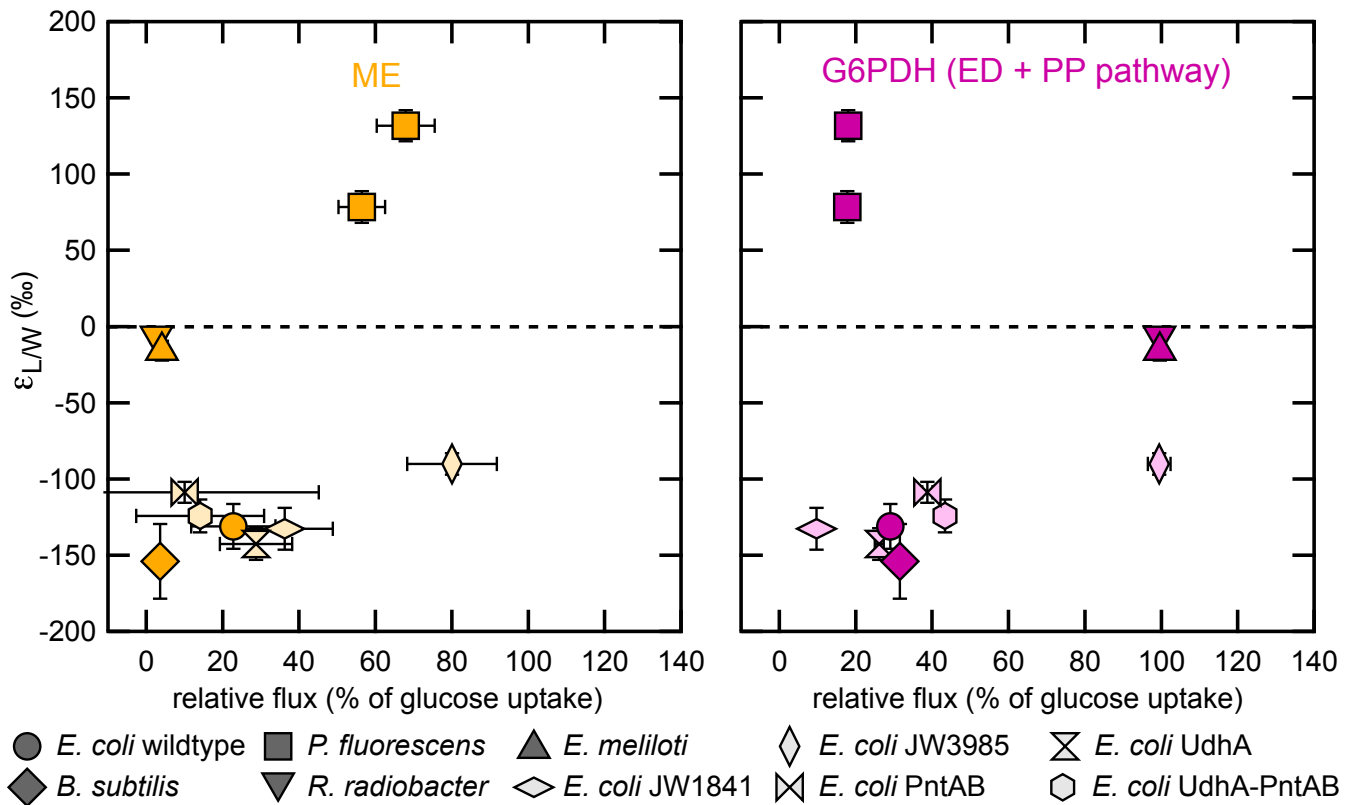

**Fig. S3.** The relationship between lipid/water fractionation ( $\epsilon_{L/W}$ ) and relative carbon flux through the NADPH generating reactions catalyzed by ME (left panel) and G6PDH (right panel). Plotted  $\epsilon_{L/W}$  values are calculated between  $\delta^2\text{H}$  values of culture medium and abundance-weighted mean  $\delta^2\text{H}$  values of fatty acids. The error bars represent the corresponding abundance-weighted standard deviation. Note that some error bars are smaller than marker sizes.

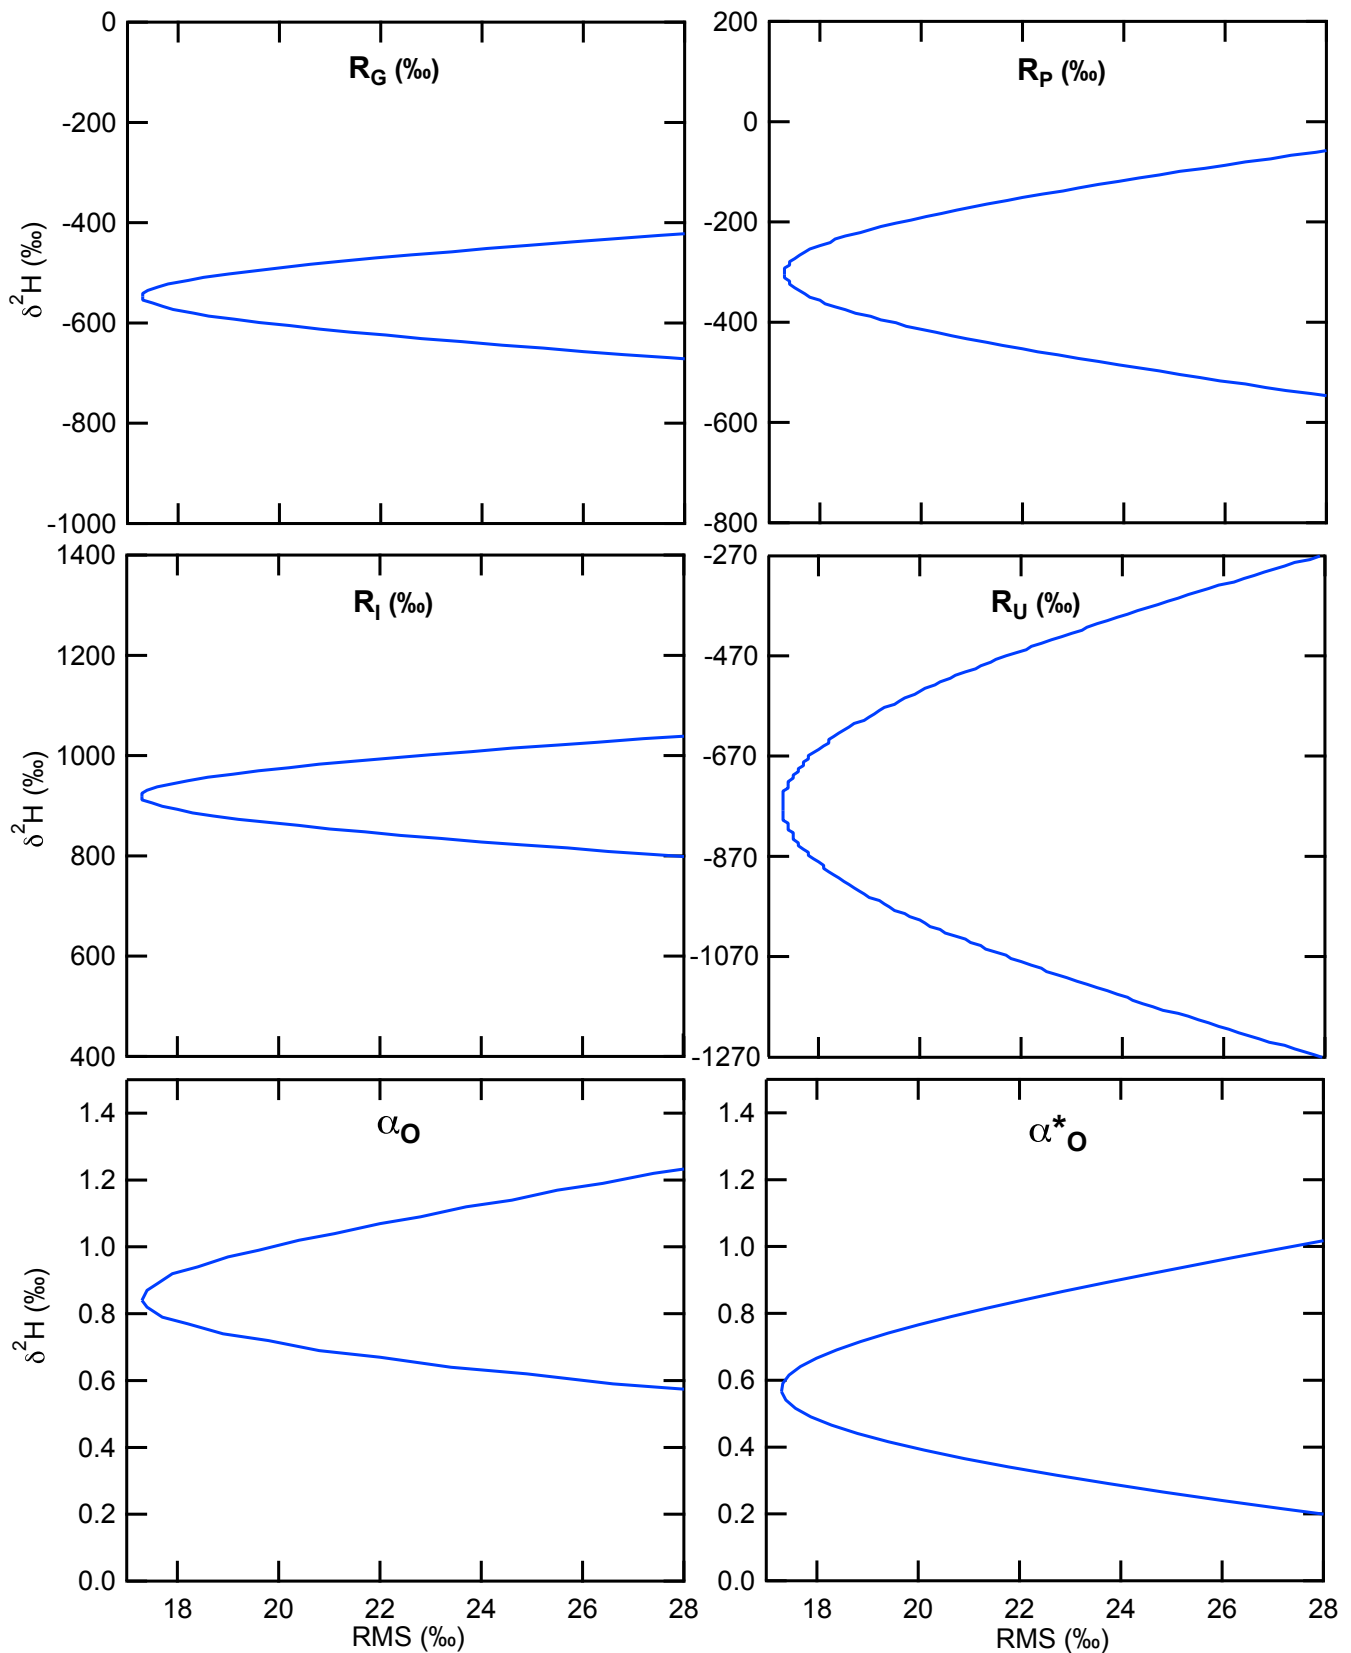

**Fig. S4.** Sensitivity analysis for the best fit parameters. The relationship between the change in one parameter at a time and the corresponding increase in RMS is shown.  $R_G$  account for G6PDH,  $R_P$  for 6PGDH, and  $R_I$  for ICDH.  $R_U$  and  $\alpha_O$  account for the membrane-bound (PntAB) and soluble (UdhA) transhydrogenase from *E. coli*, respectively.  $\alpha^*_O$  account for the soluble transhydrogenases or alternative mechanisms to balance NADPH levels in all other species. The conclusion that H from 6PGDH and G6PDH is strongly  $^2H$ -depleted relative to that from ICDH appears robust, also that both transhydrogenases exhibit normal KIEs.

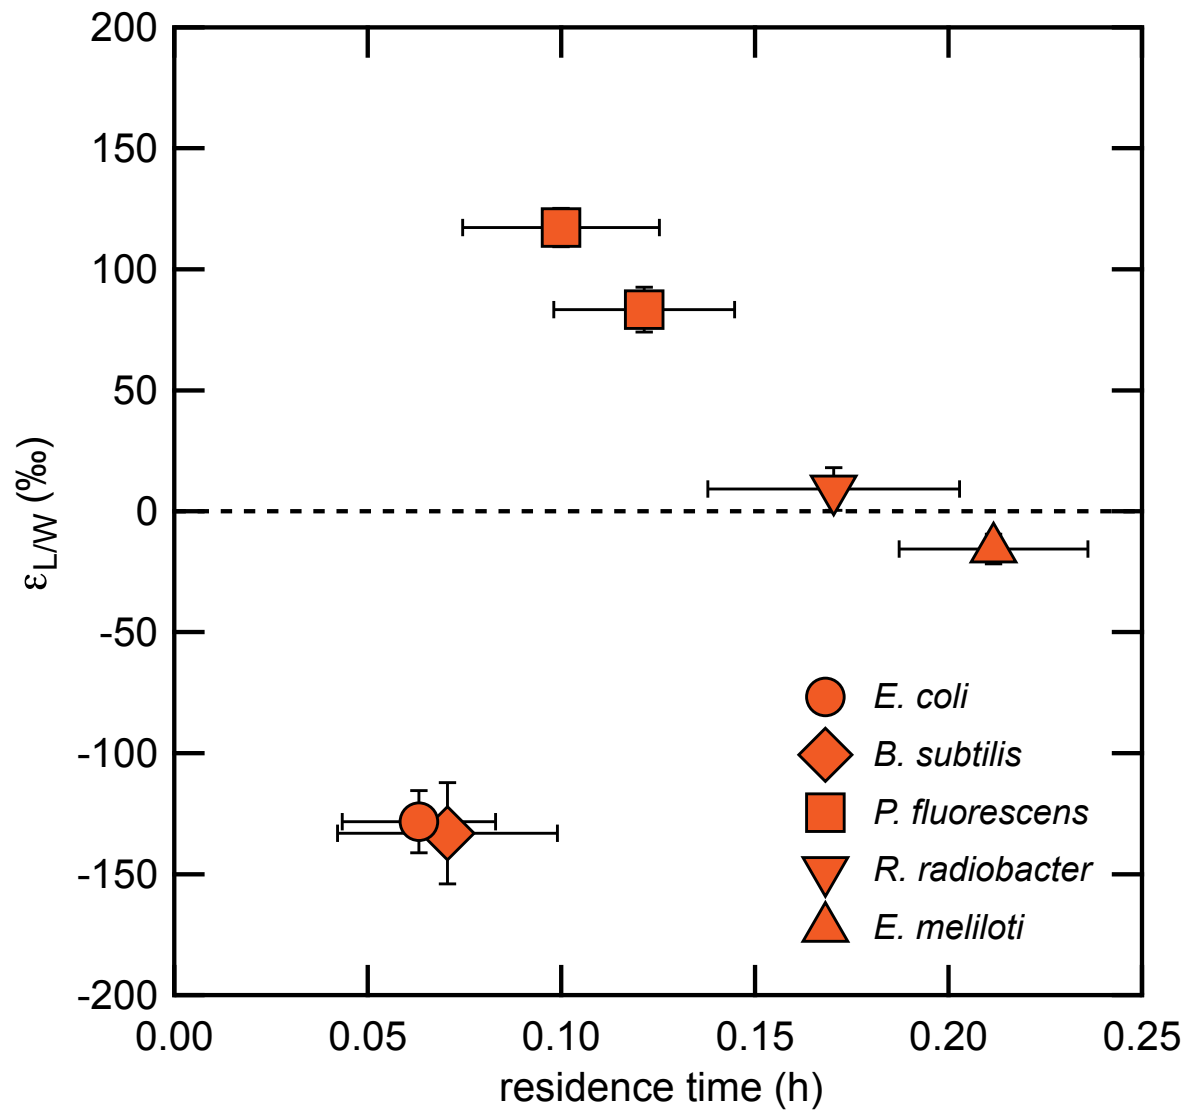

**Fig. S5.** Lipid/water fractionation ( $\epsilon_{L/W}$ ) versus NADPH turnover time for the six wildtype strains. Turnover times are calculated from production rates based on metabolic fluxes and intracellular NADPH concentrations.



**Table S1. Relative abundances of fatty acids in bacterial cultures.**

| Nr.                                    | Strain     | S <sup>†</sup> | n <sup>‡</sup> | Relative abundance of fatty acids* (%) |       |      |       |       |      |       |      |      |       |       |       |      |      |
|----------------------------------------|------------|----------------|----------------|----------------------------------------|-------|------|-------|-------|------|-------|------|------|-------|-------|-------|------|------|
|                                        |            |                |                | 12:0                                   | i14:0 | 14:0 | i15:0 | a15:0 | 15:0 | i16:0 | 16:1 | 16:0 | i17:0 | a17:0 | cyc17 | 18:1 | 19:1 |
| <b><i>E. coli</i> WT</b>               |            |                |                |                                        |       |      |       |       |      |       |      |      |       |       |       |      |      |
| 1                                      | MG1655     | glu            | 1              | 3                                      | -     | 6    | -     | -     | 3    | -     | 21   | 41   | -     | -     | 13    | 14   | -    |
| 2                                      |            | pyr            | 1              | 3                                      | -     | 8    | -     | -     | -    | -     | 13   | 43   | -     | -     | 20    | 11   | 1    |
| 3                                      |            | ace            | 2              | 3                                      | -     | 8    | -     | -     | 1    | -     | 13   | 44   | -     | -     | 19    | 9    | 2    |
| <b><i>E. coli</i> knockout mutants</b> |            |                |                |                                        |       |      |       |       |      |       |      |      |       |       |       |      |      |
| 4                                      | JW1841     | glu            | 1              | 2                                      | -     | 4    | -     | -     | -    | -     | 17   | 32   | -     | -     | 15    | 28   | 2    |
| 5                                      | JW3985     | glu            | 1              | 2                                      | -     | 5    | -     | -     | -    | -     | 19   | 38   | -     | -     | 19    | 17   | -    |
| 6                                      | PntAB      | glu            | 1              | 3                                      | -     | 7    | -     | -     | 1    | -     | 22   | 42   | -     | -     | 10    | 15   | -    |
| 7                                      | UDHA       | glu            | 1              | 3                                      | -     | 7    | -     | -     | -    | -     | 26   | 40   | -     | -     | 8     | 16   | -    |
| 8                                      | PntAB UDHA | glu            | 1              | 4                                      | -     | 6    | -     | -     | -    | -     | 24   | 42   | -     | -     | 9     | 15   | -    |
| <b><i>B. subtilis</i></b>              |            |                |                |                                        |       |      |       |       |      |       |      |      |       |       |       |      |      |
| 9                                      | PY79       | glu            | 1              | -                                      | 2     | -    | 13    | 45    | -    | 8     | -    | 4    | 8     | 21    | -     | -    | -    |
| 10                                     |            | glu            | 1              | -                                      | -     | -    | 19    | 48    | -    | 9     | -    | -    | 8     | 16    | -     | -    | -    |
| 11                                     |            | glu            | 1              | -                                      | 3     | -    | 22    | 40    | -    | 9     | -    | 3    | 10    | 14    | -     | -    | -    |
| 12                                     |            | glu            | 1              | -                                      | 3     | -    | 17    | 44    | -    | 10    | -    | 5    | 7     | 14    | -     | -    | -    |
| 13                                     |            | glu            | 1              | -                                      | 3     | -    | 17    | 45    | -    | 9     | -    | 5    | 8     | 14    | -     | -    | -    |
| 14                                     |            | glu            | 1              | -                                      | 2     | -    | 23    | 40    | -    | 8     | -    | 3    | 11    | 13    | -     | -    | -    |
| 15                                     |            | glu            | 1              | -                                      | 2     | -    | 19    | 45    | -    | 8     | -    | 3    | 8     | 15    | -     | -    | -    |
| 16                                     |            | glu            | 1              | -                                      | 3     | -    | 20    | 41    | -    | 9     | -    | 4    | 9     | 14    | -     | -    | -    |
| 17                                     |            | pyr            | 3              | -                                      | 3     | -    | 22    | 41    | -    | 10    | -    | 4    | 8     | 11    | -     | -    | -    |
| 18                                     |            | suc            | 3              | -                                      | 6     | -    | 17    | 42    | -    | 19    | -    | 5    | -     | 11    | -     | -    | -    |
| <b><i>P. fluorescens</i></b>           |            |                |                |                                        |       |      |       |       |      |       |      |      |       |       |       |      |      |
| 19                                     | WCS365     | glu            | 1              | 6                                      | -     | -    | -     | -     | -    | -     | 40   | 40   | -     | -     | -     | 15   | -    |
| 20                                     |            | glu            | 1              | 8                                      | -     | -    | -     | -     | -    | -     | 43   | 33   | -     | -     | -     | 16   | -    |
| 21                                     |            | glu            | 1              | 3                                      | -     | -    | -     | -     | -    | -     | 39   | 37   | -     | -     | 2     | 19   | -    |
| 22                                     |            | glu            | 1              | 5                                      | -     | -    | -     | -     | -    | -     | 38   | 36   | -     | -     | 2     | 19   | -    |
| 23                                     |            | glu            | 1              | 6                                      | -     | -    | -     | -     | -    | -     | 39   | 35   | -     | -     | 1     | 18   | -    |
| 24                                     |            | glu            | 1              | 4                                      | -     | -    | -     | -     | -    | -     | 38   | 36   | -     | -     | 2     | 20   | -    |
| 25                                     |            | fru            | 3              | 3                                      | -     | -    | -     | -     | -    | -     | 40   | 38   | -     | -     | 4     | 16   | -    |
| 26                                     |            | gal            | 3              | 4                                      | -     | -    | -     | -     | -    | -     | 29   | 40   | -     | -     | 12    | 15   | -    |
| 27                                     |            | pyr            | 3              | 3                                      | -     | -    | -     | -     | -    | -     | 40   | 36   | -     | -     | -     | 21   | -    |
| 28                                     |            | suc            | 3              | 4                                      | -     | -    | -     | -     | -    | -     | 40   | 36   | -     | -     | -     | 20   | -    |
| 29                                     |            | ace            | 3              | 4                                      | -     | -    | -     | -     | -    | -     | 38   | 36   | -     | -     | 2     | 20   | -    |
| 30                                     |            | cit            | 3              | 4                                      | -     | -    | -     | -     | -    | -     | 40   | 36   | -     | -     | -     | 20   | -    |
| 31                                     |            | ben            | 3              | 2                                      | -     | -    | -     | -     | -    | -     | 42   | 37   | -     | -     | -     | 19   | -    |
| 32                                     | 2-79       | glu            | 1              | 2                                      | -     | -    | -     | -     | -    | -     | 32   | 41   | -     | -     | 9     | 16   | -    |
| <b><i>R. radiobacter</i></b>           |            |                |                |                                        |       |      |       |       |      |       |      |      |       |       |       |      |      |
| 33                                     | C58        | glu            | 1              | -                                      | -     | -    | -     | -     | -    | -     | 4    | 9    | -     | -     | 1     | 82   | 5    |
| 34                                     |            | glu            | 1              | -                                      | -     | -    | -     | -     | -    | -     | -    | 11   | -     | -     | -     | 83   | 5    |
| 35                                     |            | glu            | 1              | -                                      | -     | -    | -     | -     | -    | -     | 4    | 4    | -     | -     | -     | 86   | 5    |
| 36                                     |            | glu            | 1              | -                                      | -     | -    | -     | -     | -    | -     | -    | 11   | -     | -     | -     | 84   | 5    |
| 37                                     |            | glu            | 1              | -                                      | -     | -    | -     | -     | -    | -     | 4    | 12   | -     | -     | -     | 78   | 6    |
| 38                                     |            | glu            | 1              | -                                      | -     | -    | -     | -     | -    | -     | -    | 11   | -     | -     | -     | 83   | 5    |
| 39                                     |            | fru            | 3              | -                                      | -     | -    | -     | -     | -    | -     | 10   | 10   | -     | -     | -     | 77   | 3    |
| 40                                     |            | pyr            | 3              | -                                      | -     | -    | -     | -     | -    | -     | 4    | 10   | -     | -     | -     | 81   | 5    |
| 41                                     |            | suc            | 3              | -                                      | -     | -    | -     | -     | -    | -     | -    | 12   | -     | -     | -     | 88   | -    |
| 42                                     |            | ace            | 3              | -                                      | -     | -    | -     | -     | -    | -     | 4    | 13   | -     | -     | -     | 59   | 23   |
| <b><i>E. meliloti</i></b>              |            |                |                |                                        |       |      |       |       |      |       |      |      |       |       |       |      |      |
| 43                                     |            | glu            | 1              | -                                      | -     | -    | -     | -     | -    | -     | 2    | 8    | -     | -     | 1     | 87   | 3    |
| 44                                     |            | glu            | 1              | -                                      | -     | -    | -     | -     | -    | -     | -    | 9    | -     | -     | -     | 85   | 6    |
| 45                                     |            | glu            | 1              | -                                      | -     | -    | -     | -     | -    | -     | -    | 9    | -     | -     | -     | 85   | 6    |
| 46                                     |            | glu            | 1              | -                                      | -     | -    | -     | -     | -    | -     | -    | 9    | -     | -     | -     | 84   | 6    |
| 47                                     |            | glu            | 1              | -                                      | -     | -    | -     | -     | -    | -     | -    | 10   | -     | -     | -     | 83   | 8    |
| 48                                     |            | glu            | 1              | -                                      | -     | -    | -     | -     | -    | -     | -    | 12   | -     | -     | -     | 75   | 13   |
| 49                                     |            | fru            | 3              | -                                      | -     | -    | -     | -     | -    | -     | -    | 10   | -     | -     | -     | 90   | -    |
| 50                                     |            | pyr            | 3              | -                                      | -     | -    | -     | -     | -    | -     | -    | 7    | -     | -     | -     | 84   | 9    |
| 51                                     |            | suc            | 3              | -                                      | -     | -    | -     | -     | -    | -     | -    | 3    | -     | -     | -     | 40   | 57   |
| 52                                     |            | ace            | 3              | -                                      | -     | -    | -     | -     | -    | -     | -    | 9    | -     | -     | -     | 79   | 12   |

66 \* 12:0, dodecanoic acid; i14:0, 12-methyltridecanoic acid; 14:0, tetradecanoic acid; i15:0, 13-methyltetradecanoic acid ; a15:0, 12-methyltetradecanoic acid; 15:0,  
67 pentadecanoic acid; i16:0, 14-methylpentadecanoic acid; 16:1, hexadecenoic acid; 16:0, hexadecanoic acid; i17:0, 15-methylhexadecanoic acid; a17:0, 14-methylhexadecanoic  
68 acid ; cyc17, cis-9,10-methylene-hexadecanoic acid; 18:1, octadecenoic acid; 19:1, nonadecenoic acid; Relative abundances are calculated from the peak areas of the  
69 GC/IRMS chromatograms; <sup>†</sup> Substrates (S) for culture experiment were glucose (glu), fructose (fru), galactose (gal), pyruvate (pyr), succinate (suc), acetate (ace), citrate (cit),  
70 and benzoic acid (ben); <sup>‡</sup> number of replicated batch cultures.

**Table S2. Measured  $\delta^2\text{H}$  values of fatty acids and culture media water as well as calculated abundance-weighted mean  $\delta^2\text{H}$  values for each culture.**

| Nr. *                                 | Fatty acid $\delta^2\text{H}$ (‰) <sup>†</sup> |       |      |       |       |      |       |      |      |       |       |       |      |      | mean $\delta^2\text{H}$ |      |
|---------------------------------------|------------------------------------------------|-------|------|-------|-------|------|-------|------|------|-------|-------|-------|------|------|-------------------------|------|
|                                       | 12:0                                           | i14:0 | 14:0 | i15:0 | a15:0 | 15:0 | i16:0 | 16:1 | 16:0 | i17:0 | a17:0 | cyc17 | 18:1 | 19:1 | H <sub>2</sub> O        | FA   |
| <b><i>E.coli</i> WT</b>               |                                                |       |      |       |       |      |       |      |      |       |       |       |      |      |                         |      |
| 1                                     | -206                                           | -     | -203 | -     | -     | -230 | -     | -216 | -205 | -     | -     | -195  | -204 | -    | -88                     | -208 |
| 2                                     | -163                                           | -     | -156 | -     | -     | -    | -     | -160 | -143 | -     | -     | -133  | -132 | -119 | -91                     | -143 |
| 3                                     | -53                                            | -     | -43  | -     | -     | -73  | -     | -44  | -25  | -     | -     | -17   | -17  | -2   | -91                     | -28  |
| <b><i>E.coli</i> knockout mutants</b> |                                                |       |      |       |       |      |       |      |      |       |       |       |      |      |                         |      |
| 4                                     | -191                                           | -     | -193 | -     | -     | -    | -     | -223 | -201 | -     | -     | -191  | -214 | -165 | -84                     | -206 |
| 5                                     | -168                                           | -     | -169 | -     | -     | -    | -     | -175 | -171 | -     | -     | -160  | -158 | -    | -85                     | -167 |
| 6                                     | -178                                           | -     | -178 | -     | -     | -191 | -     | -183 | -171 | -     | -     | -163  | -175 | -    | -74                     | -174 |
| 7                                     | -223                                           | -     | -223 | -     | -     | -    | -     | -231 | -218 | -     | -     | -196  | -216 | -    | -90                     | -219 |
| 8                                     | -204                                           | -     | -200 | -     | -     | -    | -     | -216 | -201 | -     | -     | -180  | -201 | -    | -90                     | -203 |
| <b><i>B.subtilis</i></b>              |                                                |       |      |       |       |      |       |      |      |       |       |       |      |      |                         |      |
| 9                                     | -                                              | -164  | -    | -191  | -232  | -    | -171  | -    | -194 | -177  | -215  | -     | -    | -    | -68                     | -211 |
| 10                                    | -                                              | -     | -    | -77   | -92   | -    | -48   | -    | -    | -63   | -62   | -     | -    | -    | 194                     | -78  |
| 11                                    | -                                              | 5     | -    | 14    | -16   | -    | 23    | -    | -13  | 19    | 4     | -     | -    | -    | 351                     | 1    |
| 12                                    | -                                              | 47    | -    | 42    | 29    | -    | 55    | -    | 19   | 49    | 46    | -     | -    | -    | 448                     | 37   |
| 13                                    | -                                              | 132   | -    | 120   | 111   | -    | 143   | -    | 119  | 131   | 126   | -     | -    | -    | 618                     | 120  |
| 14                                    | -                                              | 137   | -    | 157   | 125   | -    | 164   | -    | 115  | 163   | 164   | -     | -    | -    | 667                     | 144  |
| 15                                    | -                                              | 195   | -    | 201   | 188   | -    | 213   | -    | 169  | 207   | 195   | -     | -    | -    | 798                     | 195  |
| 16                                    | -                                              | 216   | -    | 253   | 223   | -    | 247   | -    | 209  | 252   | 262   | -     | -    | -    | 911                     | 239  |
| 17                                    | -                                              | -58   | -    | -63   | -84   | -    | -47   | -    | -77  | -64   | -51   | -     | -    | -    | -86                     | -69  |
| 18                                    | -                                              | 19    | -    | -20   | -31   | -    | 27    | -    | 3    | -     | -10   | -     | -    | -    | -88                     | -11  |
| <b><i>P.fluorescens</i></b>           |                                                |       |      |       |       |      |       |      |      |       |       |       |      |      |                         |      |
| 19                                    | 26                                             | -     | -    | -     | -     | -    | -     | 44   | 32   | -     | -     | -     | 57   | -    | -81                     | 40   |
| 20                                    | 268                                            | -     | -    | -     | -     | -    | -     | 260  | 268  | -     | -     | -     | 266  | -    | 203                     | 264  |
| 21                                    | 321                                            | -     | -    | -     | -     | -    | -     | 348  | 351  | -     | -     | 339   | 356  | -    | 319                     | 350  |
| 22                                    | 452                                            | -     | -    | -     | -     | -    | -     | 466  | 482  | -     | -     | 457   | 477  | -    | 490                     | 473  |
| 23                                    | 578                                            | -     | -    | -     | -     | -    | -     | 590  | 602  | -     | -     | 578   | 608  | -    | 643                     | 596  |
| 24                                    | 765                                            | -     | -    | -     | -     | -    | -     | 786  | 803  | -     | -     | 763   | 794  | -    | 868                     | 792  |
| 25                                    | -32                                            | -     | -    | -     | -     | -    | -     | -36  | -30  | -     | -     | -29   | -30  | -    | -87                     | -32  |
| 26                                    | -62                                            | -     | -    | -     | -     | -    | -     | -51  | -50  | -     | -     | -33   | -39  | -    | -87                     | -47  |
| 27                                    | 90                                             | -     | -    | -     | -     | -    | -     | 115  | 110  | -     | -     | -     | 120  | -    | -87                     | 113  |
| 28                                    | 198                                            | -     | -    | -     | -     | -    | -     | 232  | 219  | -     | -     | -     | 235  | -    | -86                     | 227  |
| 29                                    | 187                                            | -     | -    | -     | -     | -    | -     | 272  | 240  | -     | -     | 280   | 284  | -    | -87                     | 260  |
| 30                                    | 82                                             | -     | -    | -     | -     | -    | -     | 108  | 98   | -     | -     | -     | 116  | -    | -88                     | 105  |
| 31                                    | 130                                            | -     | -    | -     | -     | -    | -     | 167  | 156  | -     | -     | -     | 179  | -    | -89                     | 165  |
| 32                                    | -3                                             | -     | -    | -     | -     | -    | -     | -20  | -6   | -     | -     | -4    | -1   | -    | -82                     | -10  |
| <b><i>R.radiobacter</i></b>           |                                                |       |      |       |       |      |       |      |      |       |       |       |      |      |                         |      |
| 33                                    | -                                              | -     | -    | -     | -     | -    | -     | -98  | -81  | -     | -     | -67   | -88  | -77  | -82                     | -87  |
| 34                                    | -                                              | -     | -    | -     | -     | -    | -     | 28   | 74   | -     | -     | -     | 41   | 53   | 100                     | 45   |
| 35                                    | -                                              | -     | -    | -     | -     | -    | -     | 158  | 227  | -     | -     | -     | 176  | 186  | 253                     | 178  |
| 36                                    | -                                              | -     | -    | -     | -     | -    | -     | 212  | 297  | -     | -     | -     | 243  | 250  | 497                     | 250  |
| 37                                    | -                                              | -     | -    | -     | -     | -    | -     | 315  | 410  | -     | -     | -     | 344  | 350  | 632                     | 351  |
| 38                                    | -                                              | -     | -    | -     | -     | -    | -     | 418  | 504  | -     | -     | -     | 446  | 452  | 714                     | 453  |
| 39                                    | -                                              | -     | -    | -     | -     | -    | -     | -99  | -68  | -     | -     | -     | -90  | -75  | -88                     | -87  |
| 40                                    | -                                              | -     | -    | -     | -     | -    | -     | 44   | 84   | -     | -     | -     | 42   | 48   | -87                     | 47   |
| 41                                    | -                                              | -     | -    | -     | -     | -    | -     | -    | 69   | -     | -     | -     | 35   | -    | -87                     | 39   |
| 42                                    | -                                              | -     | -    | -     | -     | -    | -     | 3    | 24   | -     | -     | -     | -6   | 1    | -89                     | 0    |
| <b><i>E.melliloti</i></b>             |                                                |       |      |       |       |      |       |      |      |       |       |       |      |      |                         |      |
| 43                                    | -                                              | -     | -    | -     | -     | -    | -     | -98  | -73  | -     | -     | -86   | -92  | -78  | -76                     | -90  |
| 44                                    | -                                              | -     | -    | -     | -     | -    | -     | -1   | 56   | -     | -     | -     | 28   | 33   | 111                     | 30   |
| 45                                    | -                                              | -     | -    | -     | -     | -    | -     | 73   | 151  | -     | -     | -     | 121  | 113  | 248                     | 123  |
| 46                                    | -                                              | -     | -    | -     | -     | -    | -     | 172  | 264  | -     | -     | -     | 224  | 203  | 405                     | 226  |
| 47                                    | -                                              | -     | -    | -     | -     | -    | -     | 260  | 348  | -     | -     | -     | 304  | 274  | 544                     | 306  |
| 48                                    | -                                              | -     | -    | -     | -     | -    | -     | 321  | 407  | -     | -     | -     | 354  | 306  | 696                     | 355  |
| 49                                    | -                                              | -     | -    | -     | -     | -    | -     | -    | -103 | -     | -     | -     | -113 | -    | -85                     | -112 |
| 50                                    | -                                              | -     | -    | -     | -     | -    | -     | -    | 3    | -     | -     | -     | -15  | 3    | -77                     | -12  |
| 51                                    | -                                              | -     | -    | -     | -     | -    | -     | -    | 20   | -     | -     | -     | 6    | 24   | -83                     | 13   |
| 52                                    | -                                              | -     | -    | -     | -     | -    | -     | -    | 18   | -     | -     | -     | 1    | 20   | -76                     | 5    |

<sup>71</sup> \*The same number (Nr.) in Table S1 lists strain name, carbon source, and fatty acid abundance; <sup>†</sup> Triplicate measurements were done for each fatty acid. Typical analytical uncertainties are  $\pm 3\%$  ( $\pm\sigma$ ), replicate precision is  $\pm 8\%$  ( $\pm\sigma$ ). Fatty acid structures for corresponding abbreviations are listed in Table S1.

**Table S3. Estimated net fluxes in mmol g<sup>-1</sup> h<sup>-1</sup>**

|                                                | <i>E. coli</i> | <i>B. subtilis</i> | <i>E. meliloti</i> | <i>R. radiobacter</i> | <i>P. fluorescens</i> |              |
|------------------------------------------------|----------------|--------------------|--------------------|-----------------------|-----------------------|--------------|
|                                                | MG1655         | PY79               |                    | C58                   | 2-79                  | WCS365       |
| GLU + ATP → G6P                                | 8.30 ± 0.10    | 6.65 ± 0.09        | 3.64 ± 0.01        | 3.88 ± 0.02           | 0.48 ± 0.03           | 0.67 ± 0.05  |
| GLU → GLO                                      | -*             | -                  | -                  | -                     | 4.48 ± 0.09           | 6.25 ± 0.10  |
| GLO + ATP → 6PG                                | -              | -                  | -                  | -                     | 3.89 ± 0.09           | 5.43 ± 0.11  |
| GLO → 2KG → 6PG + NADPH                        | -              | -                  | -                  | -                     | 0.58 ± 0.05           | 0.81 ± 0.06  |
| G6P → 6PG + NADPH                              | 2.40 ± 0.09    | 2.10 ± 0.07        | 3.63 ± 0.02        | 3.86 ± 0.02           | 0.89 ± 0.06           | 1.25 ± 0.08  |
| 6PG → Ru5P + CO <sub>2</sub> + NADPH           | 1.72 ± 0.11    | 2.10 ± 0.07        | 0.37 ± 0.20        | 0.41 ± 0.18           | 0.38 ± 0.03           | 0.49 ± 0.03  |
| G6P → F6P                                      | 5.87 ± 0.12    | 4.36 ± 0.09        | 0.00 ± 0.02        | 0.00 ± 0.02           | -0.43 ± 0.03          | -0.60 ± 0.04 |
| 6PG → GAP + PYR                                | 0.69 ± 0.12    | 0.00 ± 0.00        | 3.26 ± 0.20        | 3.45 ± 0.18           | 4.99 ± 0.10           | 7.00 ± 0.11  |
| F6P + ATP → 2 GAP                              | 6.68 ± 0.13    | 5.55 ± 0.08        | 0.04 ± 0.12        | 0.06 ± 0.11           | -0.35 ± 0.02          | -0.48 ± 0.03 |
| X5P + R5P → S7P + GAP                          | 0.55 ± 0.04    | 0.68 ± 0.02        | 0.07 ± 0.07        | 0.09 ± 0.06           | 0.11 ± 0.01           | 0.15 ± 0.01  |
| X5P + E4P → F6P + T3P                          | 0.31 ± 0.04    | 0.51 ± 0.02        | 0.00 ± 0.06        | 0.00 ± 0.05           | 0.00 ± 0.01           | 0.00 ± 0.01  |
| S7P + T3P → E4P + F6P                          | 0.55 ± 0.04    | 0.68 ± 0.02        | 0.07 ± 0.07        | 0.09 ± 0.06           | 0.11 ± 0.01           | 0.15 ± 0.01  |
| GAP → PGA + ATP + NADH                         | 14.29 ± 0.21   | 11.51 ± 0.17       | 3.31 ± 0.11        | 3.52 ± 0.10           | 4.26 ± 0.09           | 5.99 ± 0.10  |
| PGA → PEP                                      | 13.40 ± 0.22   | 10.96 ± 0.17       | 1.46 ± 0.08        | 1.93 ± 0.08           | 3.72 ± 0.10           | 5.36 ± 0.11  |
| PEP → PYR + ATP                                | 9.07 ± 0.76    | 11.95 ± 0.25       | 0.63 ± 0.07        | 1.20 ± 0.07           | 3.40 ± 0.11           | 4.99 ± 0.12  |
| PYR → AcCoA + CO <sub>2</sub> + NADH           | 9.61 ± 0.29    | 8.19 ± 0.16        | 2.56 ± 0.26        | 2.89 ± 0.25           | 6.00 ± 0.23           | 9.20 ± 0.26  |
| OAA + AcCoA → ICT                              | 2.80 ± 0.33    | 1.39 ± 0.15        | 2.01 ± 0.29        | 2.16 ± 0.29           | 5.18 ± 0.24           | 8.23 ± 0.28  |
| ICT → OGA + CO <sub>2</sub> + NADPH            | 2.80 ± 0.33    | 1.39 ± 0.15        | 2.01 ± 0.29        | 2.16 ± 0.29           | 5.18 ± 0.24           | 8.23 ± 0.28  |
| OGA → FUM + CO <sub>2</sub> + 1.5 ATP + 2 NADH | 1.89 ± 0.35    | 0.90 ± 0.15        | 1.75 ± 0.32        | 1.81 ± 0.31           | 4.62 ± 0.26           | 7.59 ± 0.30  |
| FUM → MAL                                      | 1.89 ± 0.35    | 0.90 ± 0.15        | 1.75 ± 0.32        | 1.81 ± 0.31           | 4.62 ± 0.26           | 7.59 ± 0.30  |
| MAL → OAA + NADH                               | 0.00 ± 0.58    | 0.66 ± 0.06        | 1.60 ± 0.31        | 1.71 ± 0.31           | 1.80 ± 0.10           | 2.87 ± 0.14  |
| MAL → PYR + CO <sub>2</sub> + NADPH            | 1.89 ± 0.91    | 0.24 ± 0.12        | 0.15 ± 0.05        | 0.11 ± 0.06           | 2.82 ± 0.20           | 4.71 ± 0.24  |
| OAA + ATP → PEP + CO <sub>2</sub>              | 0.48 ± 0.14    | 1.35 ± 0.14        | 0.00 ± 0.01        | 0.00 ± 0.02           | -                     | -            |
| PEP + CO <sub>2</sub> → OAA                    | 4.28 ± 0.85    | -                  | -                  | -                     | -                     | -            |
| PYR + ATP + CO <sub>2</sub> → OAA              | -              | 2.82 ± 0.19        | 0.72 ± 0.11        | 0.88 ± 0.11           | 4.99 ± 0.21           | 7.16 ± 0.24  |
| OAA → PYR + CO <sub>2</sub>                    | -              | -                  | -                  | -                     | 1.02 ± 0.13           | 1.11 ± 0.18  |
| AcCoA → Acetate + ATP                          | 5.39 ± 0.10    | 6.19 ± 0.09        | -                  | -                     | -                     | -            |
| NADH → NADPH                                   | 2.67 ± 0.98    | 0.72 ± 0.21        | -                  | -                     | -                     | -            |
| NADPH → NADH                                   | -              | -                  | 1.39 ± 0.36        | 0.38 ± 0.34           | 0.42 ± 0.32           | 2.58 ± 0.38  |
| Respiration                                    | 15.42 ± 0.73   | 11.75 ± 0.10       | 5.85 ± 0.58        | 6.31 ± 0.56           | 12.4 ± 0.51           | 19.40 ± 0.60 |

  

|                                                | <i>E. coli</i> knockout mutants |             |              |              |              |
|------------------------------------------------|---------------------------------|-------------|--------------|--------------|--------------|
|                                                | JW1841                          | JW3985      | PntAB        | UdhA         | UdhA-PntAB   |
| GLU + ATP → G6P                                | 7.97 ± 0.10                     | 4.86 ± 0.10 | 7.10 ± 0.10  | 10.38 ± 0.10 | 7.16 ± 0.10  |
| GLU → GLO                                      | -*                              | -           | -            | -            | -            |
| GLO + ATP → 6PG                                | -                               | -           | -            | -            | -            |
| GLO → 2KG → 6PG + NADPH                        | -                               | -           | -            | -            | -            |
| G6P → 6PG + NADPH                              | 0.77 ± 0.10                     | 4.83 ± 0.10 | 2.75 ± 0.08  | 2.70 ± 0.12  | 3.10 ± 0.08  |
| 6PG → Ru5P + CO <sub>2</sub> + NADPH           | 0.53 ± 0.10                     | 3.05 ± 0.11 | 2.03 ± 0.09  | 1.86 ± 0.14  | 2.52 ± 0.10  |
| G6P → F6P                                      | 7.18 ± 0.14                     | 0.02 ± 0.04 | 4.33 ± 0.1   | 7.64 ± 0.14  | 4.03 ± 0.09  |
| 6PG → GAP + PYR                                | 0.24 ± 0.13                     | 1.78 ± 0.09 | 0.71 ± 0.1   | 0.84 ± 0.16  | 0.58 ± 0.10  |
| F6P + ATP → 2 GAP                              | 7.33 ± 0.15                     | 1.92 ± 0.07 | 5.42 ± 0.11  | 8.53 ± 0.15  | 5.46 ± 0.11  |
| X5P + R5P → S7P + GAP                          | 0.17 ± 0.03                     | 1.01 ± 0.03 | 0.66 ± 0.03  | 0.60 ± 0.05  | 0.83 ± 0.03  |
| X5P + E4P → F6P + T3P                          | 0.01 ± 0.04                     | 0.90 ± 0.04 | 0.45 ± 0.03  | 0.34 ± 0.05  | 0.63 ± 0.03  |
| S7P + T3P → E4P + F6P                          | 0.17 ± 0.03                     | 1.01 ± 0.04 | 0.66 ± 0.03  | 0.60 ± 0.05  | 0.82 ± 0.03  |
| GAP → PGA + ATP + NADH                         | 14.88 ± 0.23                    | 6.49 ± 0.15 | 11.96 ± 0.21 | 18.16 ± 0.23 | 12.10 ± 0.20 |
| PGA → PEP                                      | 14.31 ± 0.24                    | 6.11 ± 0.16 | 11.10 ± 0.21 | 17.20 ± 0.24 | 11.40 ± 0.21 |
| PEP → PYR + ATP                                | 9.81 ± 0.86                     | 1.18 ± 0.45 | 7.71 ± 2.32  | 11.48 ± 0.85 | 8.44 ± 1.04  |
| PYR → AcCoA + CO <sub>2</sub> + NADH           | 11.57 ± 0.30                    | 5.96 ± 0.30 | 6.53 ± 0.30  | 12.99 ± 0.29 | 8.36 ± 0.29  |
| OAA + AcCoA → ICT                              | 3.50 ± 0.34                     | 4.28 ± 0.34 | 1.86 ± 0.34  | 4.02 ± 0.33  | 1.75 ± 0.33  |
| ICT → OGA + CO <sub>2</sub> + NADPH            | 3.50 ± 0.34                     | 4.28 ± 0.34 | 1.86 ± 0.34  | 4.02 ± 0.33  | 1.75 ± 0.33  |
| OGA → FUM + CO <sub>2</sub> + 1.5 ATP + 2 NADH | 2.88 ± 0.36                     | 3.88 ± 0.36 | 0.71 ± 0.36  | 2.98 ± 0.36  | 1.01 ± 0.36  |
| FUM → MAL                                      | 2.88 ± 0.36                     | 3.88 ± 0.36 | 0.71 ± 0.36  | 2.98 ± 0.36  | 1.01 ± 0.36  |
| MAL → OAA + NADH                               | 0.00 ± 0.68                     | 0.00 ± 0.27 | 0.00 ± 2.14  | 0.00 ± 0.67  | 0.00 ± 0.85  |
| MAL → PYR + CO <sub>2</sub> + NADPH            | 2.88 ± 1.00                     | 3.88 ± 0.56 | 0.71 ± 2.49  | 2.98 ± 0.98  | 1.01 ± 1.19  |
| OAA + ATP → PEP + CO <sub>2</sub>              | 2.48 ± 0.20                     | 0.19 ± 0.07 | 0.67 ± 0.12  | 1.00 ± 0.19  | 0.53 ± 0.12  |
| PEP + CO <sub>2</sub> → OAA                    | 6.64 ± 0.95                     | 4.90 ± 0.50 | 3.59 ± 2.44  | 6.15 ± 0.93  | 3.08 ± 1.14  |
| PYR + ATP + CO <sub>2</sub> → OAA              | -                               | -           | -            | -            | -            |
| OAA → PYR + CO <sub>2</sub>                    | -                               | -           | -            | -            | -            |
| AcCoA → Acetate + ATP                          | 7.16 ± 0.10                     | 1.09 ± 0.10 | 3.15 ± 0.10  | 7.40 ± 0.10  | 5.50 ± 0.10  |
| NADH → NADPH                                   | 1.21 ± 1.07                     | -           | 0.54 ± 2.52  | 1.44 ± 1.06  | -            |
| NADPH → NADH                                   | -                               | 7.97 ± 0.67 | -            | -            | 0.02 ± 1.25  |
| Respiration                                    | 17.92 ± 0.75                    | 12.3 ± 0.72 | 10.77 ± 0.73 | 20.71 ± 0.73 | 12.21 ± 0.73 |

\* - indicates an absent reaction

**Table S4. Physiological parameter and selected metabolic fluxes for the five wildtype species and five *E.coli* knockout mutants all grown on glucose.**

| Culture                                            | GR*<br>(h <sup>-1</sup> ) | GU<br>(mmol g <sup>-1</sup> h <sup>-1</sup> ) | AS        | absolute flux <sup>†</sup> |               |               |                                               |                  |           | NADPH<br>balance <sup>‡</sup> |
|----------------------------------------------------|---------------------------|-----------------------------------------------|-----------|----------------------------|---------------|---------------|-----------------------------------------------|------------------|-----------|-------------------------------|
|                                                    |                           |                                               |           | G6PDH<br>(ED+PP)           | 6PGDH<br>(PP) | ICDH<br>(TCA) | ME<br>(mmol g <sup>-1</sup> h <sup>-1</sup> ) | EMP <sup>§</sup> | ED        |                               |
| <b>Wildtypes</b>                                   |                           |                                               |           |                            |               |               |                                               |                  |           |                               |
| <i>E. coli</i>                                     | 0.57 ± 0.01               | 8.4 ± 0.5                                     | 5.4 ± 0.5 | 2.4 ± 0.1                  | 1.7 ± 0.1     | 2.8 ± 0.3     | 1.9 ± 0.9                                     | 5.9 ± 0.1        | 0.7 ± 0.1 | -2.7                          |
| <i>B. subtilis</i>                                 | 0.38 ± 0.01               | 6.6 ± 0.5                                     | 6.2 ± 0.8 | 2.1 ± 0.1                  | 2.1 ± 0.1     | 1.4 ± 0.1     | 0.2 ± 0.1                                     | 4.4 ± 0.1        | 0.0 ± 0.0 | -0.7                          |
| <i>P. fluorescens</i>                              | 0.31 ± 0.01               | 5.0 ± 0.4                                     | 0.0 ± 0.0 | 0.9 ± 0.1 <sup>¶</sup>     | 0.4 ± 0.0     | 5.2 ± 0.2     | 2.8 ± 0.2                                     | -0.4 ± 0.0       | 5.0 ± 0.1 | 0.4                           |
| <i>P. fluorescens</i>                              | 0.38 ± 0.01               | 7.0 ± 0.7                                     | 0.0 ± 0.0 | 1.2 ± 0.1 <sup>¶</sup>     | 0.5 ± 0.0     | 8.2 ± 0.3     | 4.7 ± 0.2                                     | -0.6 ± 0.0       | 7.0 ± 0.1 | 2.6                           |
| <i>R. radiobacter</i>                              | 0.30 ± 0.00               | 3.9 ± 0.3                                     | 0.0 ± 0.0 | 3.9 ± 0.0                  | 0.4 ± 0.2     | 2.2 ± 0.3     | 0.1 ± 0.1                                     | 0.0 ± 0.0        | 3.5 ± 0.2 | 0.4                           |
| <i>E. meliloti</i>                                 | 0.17 ± 0.00               | 3.7 ± 0.4                                     | 0.0 ± 0.0 | 3.6 ± 0.0                  | 0.4 ± 0.2     | 2.0 ± 0.3     | 0.1 ± 0.1                                     | 0.0 ± 0.0        | 3.3 ± 0.2 | 1.4                           |
| <b><i>E.coli</i> knockout mutants<sup>  </sup></b> |                           |                                               |           |                            |               |               |                                               |                  |           |                               |
| JW1841                                             | 0.34 ± 0.01               | 7.1 ± 0.4                                     | 8.1 ± 0.3 | 0.8 ± 0.1                  | 0.5 ± 0.1     | 3.5 ± 0.3     | 2.9 ± 1.0                                     | 7.2 ± 0.1        | 0.2 ± 0.1 | -1.2                          |
| JW3985                                             | 0.24 ± 0.01               | 4.9 ± 0.1                                     | 1.1 ± 0.1 | 4.8 ± 0.1                  | 3.0 ± 0.1     | 4.3 ± 0.3     | 3.9 ± 0.6                                     | 0.0 ± 0.0        | 1.8 ± 0.1 | 8.0                           |
| PntAB                                              | 0.33 ± 0.01               | 8.1 ± 0.3                                     | 2.6 ± 0.4 | 2.7 ± 0.1                  | 2.0 ± 0.1     | 1.9 ± 0.3     | 0.7 ± 2.5                                     | 4.3 ± 0.1        | 0.7 ± 0.1 | -0.5                          |
| UdhA                                               | 0.58 ± 0.01               | 10.6 ± 0.8                                    | 7.3 ± 0.9 | 2.7 ± 0.1                  | 1.9 ± 0.1     | 4.0 ± 0.3     | 3.0 ± 1.0                                     | 7.6 ± 0.1        | 0.8 ± 0.2 | -1.4                          |
| UdhA-PntAB                                         | 0.42 ± 0.01               | 7.3 ± 0.4                                     | 5.4 ± 0.4 | 3.1 ± 0.1                  | 2.5 ± 0.1     | 1.8 ± 0.3     | 1.0 ± 1.2                                     | 4.0 ± 0.1        | 0.6 ± 0.1 | 0                             |

\* Growth rate (GR), glucose uptake rate (GU), and acetate secretion rate (AS) were measured. Standard deviations ( $\pm\sigma$ ) are derived from three parallel cultures. <sup>†</sup> Absolute fluxes are given in mmol g<sup>-1</sup>h<sup>-1</sup> for the four NADPH generating reactions (G6PDH, 6PGDH, ICDH, ME) and EMP and ED pathway. <sup>‡</sup> Negative values indicate NADPH underproduction relative to anabolic demand, positive values indicate NADPH overproduction. <sup>§</sup>Negative fluxes indicate reversed EMP flux. <sup>¶</sup> For *Pseudomonas* species, previously published relative flux distributions (7) were assumed due to the periplasmatic conversion of glucose to gluconate and 2-keto-gluconate. <sup>||</sup> Mutants carry the following gene deletions: G6PDH in JW1841, glucose-6-phosphate isomerase in JW3985, membrane-bound transhydrogenase in PntAB, soluble transhydrogenase in UdhA the soluble transhydrogenase, and both transhydrogenase genes in UdhA-PntAB.

74 **References**

- 75 1. Hayes JM (2001) Fractionation of the isotopes of carbon and hydrogen in biosynthetic processes. *Rev Mineral Geochem*  
76 43(1):225–277.
- 77 2. Sessions AL, Burgoyne TW, Schimmelmann A, Hayes JM (1999) Fractionation of hydrogen isotopes in lipid biosynthesis.  
78 *Org Geochem* 30(9):1193–1200.
- 79 3. White SW, Zheng J, Zhang YM, Rock (2005) The structural biology of type II fatty acid biosynthesis. *Annu Rev Biochem*  
80 74:791–831.
- 81 4. Sauer U (2003) The soluble and membrane-bound transhydrogenases UdhA and PntAB have divergent functions in NADPH  
82 metabolism of *Escherichia coli*. *J Biol Chem* 279(8):6613–6619.
- 83 5. Zhang X, Gillespie AL, Sessions AL (2009) Large D/H variations in bacterial lipids reflect central metabolic pathways.  
84 *Proc Natl Acad Sci U S A* 106(31):12580–12586.
- 85 6. Sessions AL, Hayes JM (2005) Calculation of hydrogen isotopic fractionations in biogeochemical systems. *Geochim*  
86 *Cosmochim Acta* 69(3):593–597.
- 87 7. Nikel PI, Chavarría M, Fuhrer T, Sauer U, de Lorenzo V (2015) *Pseudomonas putida* KT2440 strain metabolizes glucose  
88 through a cycle formed by enzymes of the Entner-Doudoroff, Embden-Meyerhof-Parnas, and Pentose Phosphate pathways.  
89 *J Biol Chem* 290(43):25920–25932.
